# Supplementary material
Source: MDPI journal article supplement (https://www.mdpi.com/2073-4441/10/11/1625)
Supplement: s1 [file s1]

# Supplementary Figures.

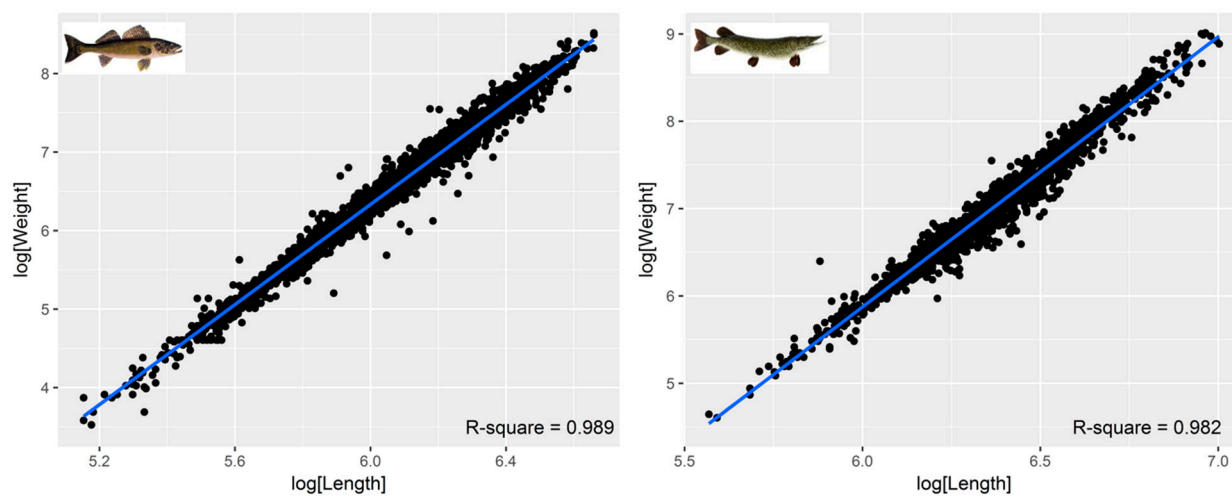

**Figure S1.** Correlation between fish body mass and body length in Walleye (left) and Northern Pike (right).
